1 Cubam receptor-mediated endocytosis in hindgut-derived pseudoplacenta  
2 of a viviparous teleost *Xenotoca eiseni*

3

4 Atsuo Iida<sup>1,\*</sup>, Kaori Sano<sup>2</sup>, Mayu Inokuchi<sup>3</sup>, Jumpei Nomura<sup>1</sup>, Takayuki Suzuki<sup>1</sup>, Mao Kuriki<sup>4</sup>, Maina  
5 Sogabe<sup>4</sup>, Daichi Susaki<sup>5</sup>, Kaoru Tonosaki<sup>5</sup>, Tetsu Kinoshita<sup>5</sup>, Eiichi Hondo<sup>1</sup>

6

7 1. Department of Animal Sciences, Graduate School of Bioagricultural Sciences, Nagoya University, Tokai  
8 National Higher Education and Research System, Nagoya, Aichi, Japan.

9 2. Department of Chemistry, Faculty of Science, Josai University, Sakado, Saitama, Japan.

10 3. Department of Life Sciences, Toyo University, Itakura, Gunma, Japan.

11 4. Department of Regeneration Science and Engineering, Institute for Frontier Life and Medical Sciences,  
12 Kyoto University, Kyoto, Kyoto, Japan.

13 5. Kihara Institute for Biological Research, Yokohama City University, Yokohama, Kanagawa, Japan.

14

15 **Correspondence:** Atsuo Iida

16 **E-mail:** [tol2.4682@gmail.com](mailto:tol2.4682@gmail.com)

17

18 **Author contribution:** A.I. designed the study. A.I., K.S., M.I., and JN carried out the experiments. T.S.,

19 M.K., and M.S. contributed to fluorescent microscopy. D.S., K.T., T.K., and E.H. contributed to next-

20 generation sequencing and data analysis. A.I. wrote the manuscript.

21

22 **Competing interest statement:** The authors declare that they have no competing interests.

23

24 **Keywords:** viviparity, teleost, Goodeidae, pseudoplacenta, endocytosis, proteolysis

25

26 **This PDF file includes:**

27 Main Text

28 Figures 1 to 5

29

30 **Abstract**

31 Nutrient transfer from mother to the embryo is essential for reproduction in viviparous animals. Here, we  
32 focused on the molecular mechanism of nutrient absorption in hindgut-derived pseudoplacenta  
33 (trophotaenia) of the viviparous teleost *Xenotoca eiseni*. The candidate genes involved in the process  
34 were identified by RNA-Seq, and then protein distribution and functions were investigated using molecular  
35 biological methods. Our results suggested that Cubam (Cubilin-Amnionless) receptor-mediated  
36 endocytosis and cathepsin L-dependent proteolysis are involved in the maternal macromolecule  
37 absorption via the trophotaenia. Such a nutrient absorption mechanism involving endocytosis is not a  
38 specific trait to viviparous fish. Similar processes have been reported in the larval stage of oviparous fish  
39 or the suckling stage of viviparous mammals. Our findings suggest that the viviparous teleost acquired  
40 trophotaenia-based viviparity via a modification of the intestinal absorption system common in vertebrates.  
41 This is a fundamental study to understand the strategic variation in the reproductive system of vertebrates.

42

## 43 **Introduction**

44 August Krogh wrote, "*For such a large number of problems there will be some animal of choice or a few*  
45 *such animals on which it can be most conveniently studied*" [1]. This study aimed to investigate the  
46 molecular mechanism of maternal nutrient absorption in a species-specific pseudoplacenta of a viviparous  
47 teleost species belonging to the family Goodeidae.

48 Viviparity is a reproduction system, whereby the oocyte is fertilized in the female body, and subsequent  
49 embryo growth occurs with maternal component supply. Each viviparous animal has acquired processes  
50 specialized to the gestation in both the mother and embryo [2]. The placenta and umbilical cords in  
51 viviparous mammals are major components of the process for mother-to-embryo material transport [3,4].  
52 Other viviparous components such as the extended yolk sac or pseudoplacenta are known in several  
53 viviparous vertebrates, except mammals [5].

54 The family Goodeidae is a freshwater small teleost distributed in Mexico, which includes approximately  
55 40 viviparous species [6]. They possess trophotaenia, which is a hindgut-derived pseudoplacenta that  
56 absorbs the maternal component [7,8]. Trophotaenia is a ribbon-like structure consisting of a single  
57 epithelial layer, internal blood vessels, and connective tissues [9,10]. The epithelial cell is like an  
58 enterocyte in the intestine. Electron microscopy indicated that microvilli form in the apical side of the cell  
59 and intracellular vesicles in the cytoplasm [11]. Since the 1980s, these structures have been believed to  
60 be involved in maternal component absorption [12]. The nature of the maternal component was predicted  
61 to be proteins or other macromolecules secreted into the serum or ovarian fluids; however, no one has  
62 experimentally determined its distinct component [13,14]. Recently, we demonstrated that a yolk protein  
63 vitellogenin is secreted into the ovarian lumen of pregnant females, and the intraovarian embryo absorbs  
64 the nutrient protein via the trophotaenia using a goodeid species *Xenotoca eiseni* [15]. In that study,  
65 enterocyte-like microvilli and intracellular vesicles were also observed in the epithelial cells of the

66 trophotaenia. We hypothesized that the epithelial layer cell in the trophotaenia absorbs the maternal  
67 protein and/or other components as macromolecules because the ovarian lumen lacks proteolysis activity  
68 like the digestive intestine. However, the molecules responsible for the trophotaenia-mediated  
69 macromolecule absorption have not been reported.

70 Vacuolated enterocytes involved in macromolecule absorption have also been reported in other  
71 vertebrate species, including suckling mammals and stomachless fish [16-18]. Park et al. [19] reported  
72 that the scavenger receptor complex Cubam (Cubilin-Amnionless) and Dab2 are required for  
73 macromolecule uptake in zebrafish juveniles. Furthermore, the conditional knockout of *Dab2* in mice led to  
74 stunted growth and severe protein malnutrition at the suckling stage [19]. Based on this report, we discuss  
75 the commonality of molecular process for the macromolecule absorption between the intestinal  
76 enterocytes and the trophotaenia [15]. However, the molecules responsible for macromolecule absorption  
77 in the trophotaenia are still elusive.

78 Here, we report candidate molecules for nutrient uptake and subsequent proteolysis in the trophotaenia  
79 of *X. eiseni*. An RNA-Seq for trophotaenia indicated candidate receptor molecules and endocytosis-  
80 associated proteases expressed in the trophotaenia. Immunohistochemistry and biochemical assays  
81 suggested the presence and functions of the candidate factors in the trophotaenia.

## 82 **Results**

### 83 *Gene expression in trophotaenia*

84 Our previous findings and the hypothesis based on that are described in Figure 1A. In a viviparous  
85 teleost, *X. eiseni*, the embryo is raised in the ovary while receiving maternal nutrients. The trophotaenia is  
86 a pseudoplacenta that plays a role in the absorption of maternal nutrients consisting of proteins and other  
87 supplements. Based on previous studies, we hypothesized that several maternal proteins are absorbed by  
88 endocytosis-mediated proteolysis in the epithelial cells of the trophotaenia. To verify this hypothesis, we  
89 explored candidate genes for receptor, adaptor, vesicle, and protease proteins that are highly expressed  
90 in the trophotaenia. RNA-Seq analyses were performed using total RNA extracted from the trophotaeniae  
91 of the 3rd- or 4th-week embryos (Figure 1B). We selected candidate genes and compared their predicted  
92 expression level as transcription per million (TPM) values that were calculated using the known transcript  
93 sequence of *P. reticulata* as reference (Dataset S1). RNA-Seq suggested that *cubilin* (*cubn*) and  
94 *amnionless* (*amn*) were highly expressed in the trophotaeniae; however, other co-receptor genes (*Irp1aa*,  
95 *Irp2a*) were considerably lower (Figure 1C, Table S1). Adaptor protein-2 (AP2) subunit genes (*ap2a1*,  
96 *ap2b1*, *ap2m1a*, and *ap2s1*) were more highly expressed than the other family adaptor genes (*Idlrap1b*  
97 and *numb*) (Figure 1C, Table S2). Two families of the vesicle coating protein genes (*clta*, *cltbb*, *cltc*; *flot1b*,  
98 *flot2a*) were expressed higher than the vesicle proteins classified in other families (*cav2* and *cav3*) (Figure  
99 1C, Table S3). The lysosomal endopeptidase enzyme gene (*ctsl.1*) exhibited a high TPM value (> 10,000)  
100 rather than that of not only protease family genes but also most of the genes expressed in the  
101 trophotaeniae (Figure 1C, Table S4). The trend of the predicted TPM values in each gene was not  
102 noticeably different between the 3<sup>rd</sup>- and 4<sup>th</sup>- week samples.

103

104 *Sequences for Cubam receptor genes*

105 A Cubam receptor is known to be a membrane-bound multi-ligand receptor consisting of Cubn and Amn  
106 (Figure 2A). The secreted protein Cubn specifically binds to the transmembrane protein Amn; thus, the  
107 CUB domain that associates with the ligands are localized on the apical surface of the plasma membrane.  
108 We obtained the amino acid sequences of *X. eiseni* Cubn and Amn by *de novo* assembly of NGS reads  
109 from the trophotaeniae. The sequences for Cubn and Amn were compared between four vertebrate  
110 species, *Homo sapiens*, *Danio rerio*, *P. reticulata*, and *X. eiseni*. The binding motifs were conserved in the  
111 species (Figure 2B and C). The intracellular domain of Amn included two conserved motifs to bind the  
112 adaptor proteins, including AP2. The motifs were also conserved in the species (Figure 2D).

113

114 *Distribution of Cubilin and Amnionnless in trophotaenia*

115 To validate the expression of *cubn* and *amn* in the trophotaenia, semi-quantitative RT-PCR analyses  
116 were performed using total RNAs extracted from the whole-embryo including the trophotaeniae, isolated  
117 trophotaeniae, and adult skeletal muscle. The muscle sample was used as a control for tissue with low  
118 endocytosis activity. The gene expression patterns did not conflict between the results of RT-PCR and  
119 RNA-Seq. In the embryo and trophotaenia, both *cubn* and *amn* were more highly expressed than *Irp2a*  
120 (Figure 3A). Conversely, no or few expressions of the target genes except *actb* as a positive control were  
121 detected in the adult muscle. Next, to detect protein localization, immunohistochemistry was performed  
122 using antibodies against Cubn or Amn. In both proteins, strong signals were observed in the epithelial  
123 monolayer of the trophotaenia, while few background noises were detected in the control assay (Figure  
124 3B-D, see also Figure S1 and S2). Confocal microscopy revealed the cellular distribution of the anti-Cubn  
125 signals. The signals in the apical surface of the epithelial cell were detected as a homogeneous

126 distribution, while almost all signals in the cytoplasm were captured as a dot pattern (Figure 3E, Figure  
127 S3). Immunoelectron microscopy revealed that the microvilli were distributed on the apical surface of the  
128 trophotaenia epithelium, and intracellular vesicles were observed in the cytoplasm; furthermore, anti-Cubn  
129 signals were distributed in the intracellular vesicles and overlapped with the microvilli on the apical surface  
130 (Figure 3F).

131

### 132 *Proteolysis activity in trophotaenia*

133 Cathepsin L is a lysosomal cysteine proteinase characterized by three conserved protease regions and  
134 active sites consisting of cysteine, histidine, or asparagine (Figure 4A). The functional regions were  
135 conserved in the *X. eiseni* Cathepsin L protein translated from the coding sequence of *ctsl.1*. RT-PCR  
136 analysis revealed a strong expression of *ctsl.1* in the trophotaenia (Figure 4B). To identify which type of  
137 cells include proteolysis activity in the trophotaenia, acidic organelles including lysosomes and  
138 endosomes were detected using a fluorescent probe. The LysoTracker® indicated the presence of acidic  
139 organelles in the epithelial layer cells (Figure 4C). The signals were distributed in the cytoplasm and were  
140 not components in the nuclei (Figure 4D). According to the RNA-Seq analysis, *ctsl.1* was presumed to be  
141 the highest expressed *cathepsin* gene in the trophotaenia; thus, we calibrated the proteolysis activity of  
142 cathepsin L in the trophotaenia using a fluorescent substrate-based measurement system. The  
143 fluorescence indicating substrate digestion was significantly higher in the trophotaenia lysate than in the  
144 control at one h after the reagent mixture. Furthermore, the intensity of the lysate condition continued to  
145 increase for 7 h (Figure 4E, Table S5). Conversely, the increase in intensity was strongly suppressed by a  
146 cathepsin L inhibitor.

147



148 *Adaptors and vesicle coating proteins*

149 The expression of candidate genes for adaptors (*ap2a1*, *ap2b1*, *ap2m1a*, *ap2s1*, *ldlrp1b*, and *numb*)

150 and vesicle coating proteins (*clta* and *cltc*) were confirmed by RT-PCR (Figure S4). We determined an

151 incomplete transcript for *X. eiseni* Dab2 from the *de novo* assembly; however, it lacked internal sequences

152 in comparison with the proteins in other vertebrates (Figure S5). Furthermore, no amplicons were

153 obtained by RT-PCR using primers designed based on the Dab2-like sequence.

154

## 155 **Discussion**

156 RNA-Seq analyses revealed high expression of the genes for receptor-mediated endocytosis in the  
157 trophotaenia of *X. eiseni* embryos. Cubn and Amn form a Cubam receptor complex that associates with  
158 Vitamin-B12, albumin, transferrin, and other ligands [20,21]. The predicted amino acid sequences for *X.*  
159 *eiseni* Cubn and Amn obtained from the *de novo* assembly both possessed a conserved motif which  
160 allowed binding to each other, and Amn retained adaptor binding sites in the intracellular region [21, 22].  
161 Immunohistochemical analysis indicated the presence of Cubn not only in the apical surface of the  
162 epithelial layer but also in the intracellular vesicles in the cells, suggesting the incorporation and recycling  
163 of endocytic receptors [23,24]. This evidence supports the idea that Cubam plays a role as a receptor for  
164 the intraovarian nutrients and is involved in endocytosis. We also indicated the low presence of Lrp2 (also  
165 known Megalin), which is a major co-receptor for Cubam [25]. This indicated that Cubam works  
166 independently or in cooperation with other co-receptors, except Lrp2, in the trophotaenia. In zebrafish, a  
167 previous study reported that Cubam-dependent endocytosis in the lysosome rich enterocytes (LREs) does  
168 not require the presence of Lrp2 [19]. This supports our hypothesis; however, we do not exclude the  
169 possibility that our sequencing and alignment processes could not catch other *lrp2* orthologous genes in  
170 *X. eiseni*. Park et al. [19] also reported that Dab2 is an essential adaptor molecule not only in the zebrafish  
171 larval intestine but also in the endocytic nutrient absorption in the ileum of suckling mice. However, we  
172 obtained only an incomplete sequence for the *X. eiseni* Dab2-like protein without an internal region  
173 compared with mammalian orthologs. This may be an alternative splice form with less endocytic activity  
174 [26,27]. Furthermore, we did not detect Dab2-like expression by RT-PCR, and we could not exclude the  
175 possibility that the predicted Dab2-like sequence is caused by an assembly error. Thus, the contribution of  
176 Dab2 to endocytosis in the trophotaenia has not been confirmed in this study. The other adaptor or vesicle  
177 coating proteins we detected were typical co-factors for receptor-mediated endocytosis. Conversely,

178 Caveolin is a vesicle coating protein involved in receptor-independent endocytosis [28]. Thus, a low  
179 expression of *caveolin* genes (*cav2* and *cav3*) does not conflict with the activation of Cubam-mediated  
180 endocytosis. Additionally, biochemical assays supported that cathepsin L is an active protease that  
181 functions in the intracellular vesicles that is configured following membrane budding. This evidence  
182 supports the idea that Cubam-mediated endocytosis and cathepsin L-dependent proteolysis is one of the  
183 key mechanisms for the absorption of the maternal component in *X. eiseni* embryos.

184 Cubam is also known to be a scavenger receptor involved in nonspecific protein uptake [20]. In this  
185 study, we did not determine the Cubam ligands in the trophotaenia. However, the candidates are limited to  
186 intraovarian secreted proteins. In several goodeid species, previous studies indicated that the ovarian  
187 fluids include various proteins in a pattern similar to that in the blood serum [13,29]. Therefore, several  
188 serum proteins, albumen, transferrin, and others known as Cubam ligands, are potential targets in the  
189 case of intraovarian nutrient absorption via the trophotaenia. Another possibility is that vitellogenin is also  
190 a potential target because it is secreted into the ovarian fluids and is absorbed into the trophotaenia via  
191 intracellular vesicles [15]. Another study suggested that the Cubn-Amn-Lrp2 receptor complex is related to  
192 transport of yolk proteins, including vitellogenin, in endodermal epithelial cells during chicken yolk sac  
193 growth [30]. These reports support the idea that Cubn and Amn are potent candidate molecules for a  
194 receptor complex involved in maternal component uptake in the trophotaenia. However, functional  
195 analyses such as gene knockout or transgenic technologies used in conventional model animals, such as  
196 laboratory mice or small oviparous fish, have not been applied to goodeid fish. For a direct validation of  
197 our hypothesis, these reverse genetic methods should also be developed in the viviparous teleost.

198 As described above, endocytosis-mediated nutrient absorption is not limited to the pseudoplacenta of the  
199 viviparous fish; it has also been reported in intestinal tissues (Figure 5). In mammals, macromolecule  
200 absorption in the intestine is limited to the suckling period [31]. In the stomachless fish, endocytosis-

201 mediated absorption is considered to continue in part of the intestine for life, because of low digestive  
202 activity in the enteric cavity [18]. We found that Cubn and Amn are also distributed in the intestinal  
203 epithelial cells of adult *X. eiseni*. (Figure S7). In most invertebrate species, because the extracellular  
204 digestive system is primitive, food particles are absorbed into the intestinal cells by vesicle trafficking and  
205 degraded by intracellular digestion [32, 33]. Thus, we hypothesize that endocytic nutrient absorption and  
206 intracellular digestion are ancestral traits common not only in vertebrates but also in invertebrates, and  
207 their importance has decreased in certain vertebrates with development of the extracellular digestive  
208 system in the enteric cavity. The ancestor of the goodeid species may have applied the endocytic process  
209 to the reproductive system, and then configured the unique hind-gut derived pseudoplacenta for  
210 matrotrophic nutrition during gestation [7,34]. To validate our hypothesis, further exhaustive omics  
211 analyses using the goodeid species and comparative research using the subfamily Empetrichthyinae,  
212 which is the oviparous species most closely related to the viviparous goodeid fish, are required [6,35].

213 This study is an investigation of species-specific traits based on the transcriptome of a non-conventional  
214 model species. The results revealed potential candidate molecules for nutrient absorption in the  
215 pseudoplacenta of the viviparous teleost. As August Krogh wrote, this kind of study would be suitable for  
216 investigation using the most appropriate species and is unsuitable for verification using alternative models  
217 such as viviparous rodents or oviparous teleosts. We believe that this study is an important and  
218 fundamental step in understanding the strategic variation of the reproductive system in vertebrates.

219

220 **Methods**

221 *Animal experiments*

222 This study was approved by the ethics review board for animal experiments at Nagoya University  
223 (Approval number: AGR2020028). We sacrificed live animals in minimal numbers under anesthesia  
224 according to the institutional guidelines.

225

226 *Fish breeding*

227 *X. eiseni* was purchased from Meito Suien Co., Ltd. (Nagoya, Japan). Adult fish were maintained in  
228 freshwater at 27 °C under a 14:10-h light: dark photoperiod cycle. Fish were bred in a mass-mating  
229 design, and approximately 30 adult fish were maintained for this study. The juveniles were fed live brine  
230 shrimp larvae, and the adults were fed Hikari Crest Micro Pellets and ultraviolet-sterilized frozen  
231 chironomid larvae (Kyorin Co., Ltd., Himeji, Japan). To accurately track the pregnancy period, the  
232 laboratory-born fish were crossed in a pair-mating design, and the mating behavior was recorded.

233

234 *Sample collection*

235 Fish samples were anesthetized using tricaine on ice before the surgical extraction of tissues or  
236 embryos. The obtained samples were stored on ice until subsequent manipulations. In this study, we  
237 dissected approximately 10 pregnant females and extracted 15–30 embryos in each operation.

238

239 *RNA-Seq*

240 Total RNA was extracted from trophotaenae of the 3<sup>rd</sup> or 4<sup>th</sup> week of the embryo extracted from the  
241 pregnant female using the RNeasy Plus Mini kit (QIAGEN). A total of six samples were obtained from  
242 three 3<sup>rd</sup> week embryos and three 4<sup>th</sup> week embryos. Next-generation sequencing (NGS) was outsourced  
243 to Macrogen Japan Corp. (Kyoto, Japan) using NovaSeq6000 (Illumina, Inc., San Diego, CA, USA).  
244 Approximately 60 million 150-bp paired-end reads were obtained in each sample. The NGS data was  
245 deposited to the DNA Data Bank of Japan (DDBJ, ID: DRA011209). *De novo* assembly and mapping to  
246 the reference sequence were performed by CLC Genomics Workbench (Filgen, Inc., Nagoya, Japan)  
247 The published transcript sequences of *Poecilia reticulata* (NCBI Genome, ID: 23338) was used as a  
248 reference. The transcript sequences of *X. eiseni* were deposited into the DDBJ. The accession numbers  
249 were listed in Table S6.

250

251 *Reverse transcription (RT) PCR*

252 Total RNA was extracted from tissues or whole embryos using the RNeasy Plus Mini kit and reverse-  
253 transcribed using SuperScript IV reverse transcriptase (Thermo Fisher Scientific). PCR was carried out  
254 using KOD-FX-Neo (Toyobo, Osaka, Japan) under the following conditions: 100 s at 94 °C, followed by 32  
255 cycles of 20 s at 94 °C, 20 s at 60 °C, 60 s at 72 °C, and 120 s at 72 °C. Primer sequences are listed in  
256 the Resource List in Table S6.

257

258 *Antibodies and antisera*

259 Antiserums against Cubn and Amn were generated in this study. The antigen sequences were 6× His-  
260 tagged peptide of 151 amino acids (aas) corresponding to the intermediate region of *X. eiseni* Cubn  
261 (Accession#, LC595284; aa 691–841) and 6× His-tagged peptide of 247 aas corresponding to the C-  
262 terminal of *X. eiseni* Amn (Accession#, LC595285). The experimental procedure has been described in  
263 our previous study [15]. All antibodies and antiserums used in this study are listed in Table S7.

264

### 265 *Immunohistochemistry*

266 Tissue samples were fixed in 4.0% paraformaldehyde/phosphate-buffered saline (PFA/PBS) at 4 °C  
267 overnight. Samples were permeabilized using 0.5% TritonX-100/PBS at room temperature for 30 min.  
268 Endogenous peroxidase was inactivated by 3.0 % hydrogen peroxide/PBS for 10 min. Then, the sample  
269 was treated with Blocking-One solution (Nacalai Tesque, Kyoto, Japan) at room temperature for 1 h.  
270 Primary antibody or antiserums were used at 1:500 dilution with Blocking-One solution. Samples were  
271 incubated with primary antibody or antiserum at 4 °C overnight. Secondary antibodies were used at a  
272 1:500 dilution in 0.1% Tween-20/PBS. Samples were treated with the secondary antibody solution at 4 °C  
273 for 2 h. We performed a 3,3'-Diaminobenzidine Tetrahydrochloride (DAB) color development using the  
274 DAB Peroxidase Substrate Kit, ImmPACT (Vector Laboratories, Inc., Burlingame, CA, USA). Microscopic  
275 observation was performed using an Olympus BX53 microscope and photographed using a DP25 digital  
276 camera (Olympus, Shinjuku, Japan).

277

### 278 *Fluorescent Immunohistochemistry*

279 Tissue samples were fixed in 4.0% PFA/PBS at 4 °C overnight. Samples were permeabilized using 0.5%

280 TritonX-100/PBS at room temperature for 30 min. Endogenous peroxidase was inactivated by 3.0 %  
281 hydrogen peroxide/PBS for 10 min. Then, the sample was treated with Blocking-One solution (Nacalai  
282 Tesque, Kyoto, Japan) at room temperature for 1 h. Primary antibody (anti-Cubn) was used at a 1:500  
283 dilution with Blocking-One solution. Samples were incubated with primary antibody at 4 °C overnight.  
284 Secondary antibody was used at a 1:500 dilution in 0.1% Tween-20/PBS with 4',6-diamidino-2-  
285 phenylindole (DAPI). Samples were treated with the secondary antibody solution at 4 °C overnight.  
286 Microscopic observation was performed using a Leica TCS SP8 microscope (Leica Microsystems,  
287 Wetzlar, Germany).

288

#### 289 *Immunoelectron microscopy*

290 Embryo samples were fixed in 4.0% PFA/PBS. Fixed samples were washed in PBS, then reacted with a  
291 primary antibody (anti-Cubn) at 4 °C overnight, and then reacted with biotinylated anti-rabbit IgG (Vector,  
292 Burlingame, CA, USA) at room temperature for 2 h. Samples were performed with the avidin–biotin–  
293 peroxidase complex kit (Vector), and visualized with 0.05% DAB (Dojindo Laboratories, Kumamoto,  
294 Japan) and 0.01% hydrogen peroxide in 50 mM Tris buffer (pH 7.2) at room temperature for 10 min. The  
295 procedure for electron microscopy is described in our previous study [15].

296

#### 297 *Labeling acidic organelles*

298 The live embryos immediately after extraction from the pregnant female at the 4<sup>th</sup>-week post-mating were  
299 incubated in PBS with a 1:1000 dilution of LysoTracker® Red (Thermo Fisher Scientific) for 1 h at room  
300 temperature. The samples were fixed with 4.0 % PFA/PBS and stained with DAPI. Microscopic



301 observation was performed using a Leica DM5000 B microscope (Leica Microsystems, Wetzlar,  
302 Germany).

303

304 *Measurement of Cathepsin L activity*

305 The trophotaenia lysate was prepared from six littermate embryos obtained from the pregnant females at  
306 the 4<sup>th</sup>-week post-mating. The trophotaeniae were manually extracted from the embryo under a  
307 microscope. Proteolysis detection was performed using the Cathepsin L Activity Fluorometric Assay Kit  
308 (BioVision, Inc., Milpitas, CA, USA). The fluorescence intensities were measured using a Qubit 4  
309 Fluorometer (Thermo Fisher Scientific).

310

311 **Acknowledgments**

312 This work was supported by research grants from the Nakatsuji Foresight Foundation and the Daiko

313 Foundation.

314

315 **Data accessibility**

316 The data that support the findings have been provided with the manuscript.

317

318 **References**

- 319 1. A. Krogh, The progress of physiology. *Am. J. Physiol.* **90**, 243-251 (1929).
- 320
- 321 2. D. Blackburn, "Viviparity and oviparity: Evolution and reproductive strategies" in: Encyclopedia of
- 322 Reproduction, Vol. 4, E. Knobil, J. D. Neill, Eds. (Academic Press, 1999), pp. 994-1003.
- 323
- 324 3. G. J. Burton, A. L. Fowden, Review: The placenta and developmental programming: balancing
- 325 fetal nutrient demands with maternal resource allocation. *Placenta.* **33**, S23-S27 (2012).
- 326
- 327 4. R. W. Gill, G. Kossoff, P. S. Warren, W. J. Garrett, Umbilical venous flow in normal and
- 328 complicated pregnancy. *Ultrasound Med. Biol.* **10**, 349-363 (1984).
- 329
- 330 5. R. M. Roberts, J. A. Green, L. C. Schulz, The evolution of the placenta. *Reproduction* (Cambridge,
- 331 England), **152**, R179–R189 (2016).
- 332
- 333 6. K. L. Foster, K. R. Piller, Disentangling the drivers of diversification in an imperiled group of
- 334 freshwater fishes (Cyprinodontiformes: Goodeidae). *BMC Evol. Biol.* **18**, 116 (2018).
- 335
- 336 7. C. L. Turner, Pericardial sac, trophotaeniae, and alimentary tract in embryos of goodeid fishes. *J.*
- 337 *Morphol.* **67**, 271-289 (1940).
- 338
- 339 8. S. M. Tinguely, A. Lange, C. R. Tyler, Ontogeny and Dynamics of the Gonadal Development,
- 340 Embryogenesis, and Gestation in *Xenotoca eiseni* (Cyprinodontiformes, Goodeidae). *Sex Dev.*
- 341 **13**, 297-310 (2019).

- 342
- 343 9. C. L. Turner, Viviparity Superimposed upon Ovo-Viviparity in the Goodeidae, a Family of
- 344 Cyprinodont Teleost Fishes of the Mexican Plateau. *J. Morphol.* **55**, 207- 251 (1933).
- 345
- 346 10. C. L. Turner, The trophotaeniae of the goodeidae, a family of viviparous cyprinodont fishes. *J.*
- 347 *Morphol.* **61**, 495- 523 (1937).
- 348
- 349 11. J. Lombardi, J. P. Wourms, The trophotaenial placenta of a viviparous goodeid fish. I.
- 350 Ultrastructure of the internal ovarian epithelium, the maternal component. *J. Morphol.* **184**, 277-
- 351 292 (1985).
- 352
- 353 12. F. Hollenberg, J. P. Wourms, Ultrastructure and protein uptake of the embryonic trophotaeniae of
- 354 four species of goodeid fishes (Teleostei: Atheriniformes). *J. Morphol.* **219**, 105-129 (1994).
- 355
- 356 13. F. Hollenberg, J. P. Wourms, Embryonic growth and maternal nutrient sources in goodeid fishes
- 357 (Teleostei: Cyprinodontiformes). *J. Exp. Zool.* **271**, 379–394 (1995).
- 358
- 359 14. A. Vega-López, E. Ortiz-Ordóñez, E. Uría-Galicia, E. L. Mendoza-Santana, R. Hernández-
- 360 Cornejo, *et al.*, The role of vitellogenin during gestation of *Girardinichthys viviparus* and *Ameba*
- 361 *splendens*; two goodeid fish with matrotrophic viviparity. *Comp. Biochem. Physiol. Part A Mol.*
- 362 *Integr. Physiol.* **147**, 731–742 (2007).
- 363
- 364 15. A. Iida, H. N. Arai, Y. Someya, M. Inokuchi, T. A. Onuma, *et al.*, Mother-to-embryo vitellogenin
- 365 transport in a viviparous teleost *Xenotoca eiseni*. *PNAS*, **116**, 22359-22365 (2019).

- 366
- 367 16. J. P. Kraehenbuhl, C. Bron, C., B. Sordat, Transfer of humoral secretory and cellular immunity from  
368 mother to offspring. *Curr. Top. Pathol.* **66**, 105–157 (1979).
- 369
- 370 17. P. C. Moxey, J. S. Trier, Development of villus absorptive cells in the human fetal small intestine: a  
371 morphological and morphometric study. *Anat. Rec.* **195**, 463–482 (1979).
- 372
- 373 18. J. H. Rombout, C. H. Lamers, M. H. Helfrich, A. Dekker, J. J. Taverne-Thiele, Uptake and  
374 transport of intact macromolecules in the intestinal epithelium of carp (*Cyprinus carpio L.*) and the  
375 possible immunological implications. *Cell Tissue Res.* **239**, 519-530 (1985).
- 376
- 377 19. J. Park, D. S. Levic, K. D. Sumigray, J. Bagwell, O. Eroglu, *et al.*, Lysosome-Rich Enterocytes  
378 Mediate Protein Absorption in the Vertebrate Gut. *Dev. Cell.* **51**, 7-20 (2019).
- 379
- 380 20. P. J. Verroust, H. Birn, R. Nielsen, R. Kozyraki, E. I. Christensen, The tandem endocytic receptors  
381 megalin and cubilin are important proteins in renal pathology. *Kidney Int.* **62**, 745-756 (2002).
- 382
- 383 21. G. A. Pedersen, S. Chakraborty, A. L. Steinhauser, L. M. Traub, M. Madsen, AMN directs  
384 endocytosis of the intrinsic factor-vitamin B(12) receptor cubam by engaging ARH or Dab2. *Traffic.*  
385 **11**, 706-720 (2010).
- 386
- 387 22. C. Larsen, A. Etzerodt, M. Madsen, K. Skjødt, S. K. Moestrup, C. B. F. Andersen, Structural  
388 assembly of the megadalton-sized receptor for intestinal vitamin B12 uptake and kidney protein  
389 reabsorption. *Nat. Commun.* **9**, 5204 (2018).

- 390
- 391 23. E. I. Christensen, H. Birn, P. Verroust, S. K. Moestrup, Membrane receptors for endocytosis in the  
392 renal proximal tubule. *Int. Rev. Cytol.* **180**, 237-284 (1998).
- 393
- 394 24. B. D. Grant, J. G. Donaldson, Pathways and mechanisms of endocytic recycling. *Nat. Rev. Mol.*  
395 *Cell Biol.* **10**, 597-608 (2009).
- 396
- 397 25. E. I. Christensen, H. Birn, Megalin and cubilin: multifunctional endocytic receptors. *Nat. Rev. Mol.*  
398 *Cell Biol.* **4**, 256-266 (2002).
- 399
- 400 26. M. E. Maurer, J. A. Cooper, Endocytosis of megalin by visceral endoderm cells requires the Dab2  
401 adaptor protein. *J. Cell Sci.* **118**, 5345-55 (2005).
- 402
- 403 27. C. V. Finkielstein, D. G. Capelluto, Disabled-2: A modular scaffold protein with multifaceted  
404 functions in signaling. *Bioessays.* **38**, S45-55 (2016).
- 405
- 406 28. T. M. Williams, M. P. Lisanti, The caveolin proteins. *Genome Biol.* **5**, 214 (2004).
- 407
- 408 29. J. F. Schindler, Structure and function of placental exchange surfaces in goodeid fishes (Teleostei:  
409 Atheriniformes). *J. Morphol.* **276**, 991-1003 (2015).
- 410
- 411 30. R. Bauer, J. A. Plieschnig, T. Finkes, B. Riegler, M. Hermann, W. J. Schneider, The developing  
412 chicken yolk sac acquires nutrient transport competence by an orchestrated differentiation  
413 process of its endodermal epithelial cells. *J. Biol. Chem.* **288**, 1088-1098 (2013).

414

415 31. V. Muncan, J. Heijmans, S. D. Krasinski, N. V. Büller, M. E. Wildenberg, *et al.*, Blimp1 regulates  
416 the transition of neonatal to adult intestinal epithelium. *Nat. Commun.* **2**, 452 (2011).

417

418 32. P. V. Fankboner, Digestive System of Invertebrates. In book: eLS (2001).

419

420 33. V. Hartenstein, P. Martinez, Phagocytosis in cellular defense and nutrition: a food-centered  
421 approach to the evolution of macrophages. *Cell Tissue Res.* **377**, 527–547 (2019).

422

423 34. M. C. Uribe, H. J. Grier, S. A. Avila-Zúñiga, A. García-Alarcón, Change of lecithotrophic to  
424 matrotrophic nutrition during gestation in the viviparous teleost *Xenotoca eiseni* (Goodeidae). *J.*  
425 *Morphol.* **279**, 1336-1345 (2018).

426

427 35. R. Van Der Laan, W. N. Eschmeyer, R. Fricke, Family-group names of Recent fishes. *Zootaxa.*  
428 **3882**, 1-230 (2014).

429

430

431

432

433

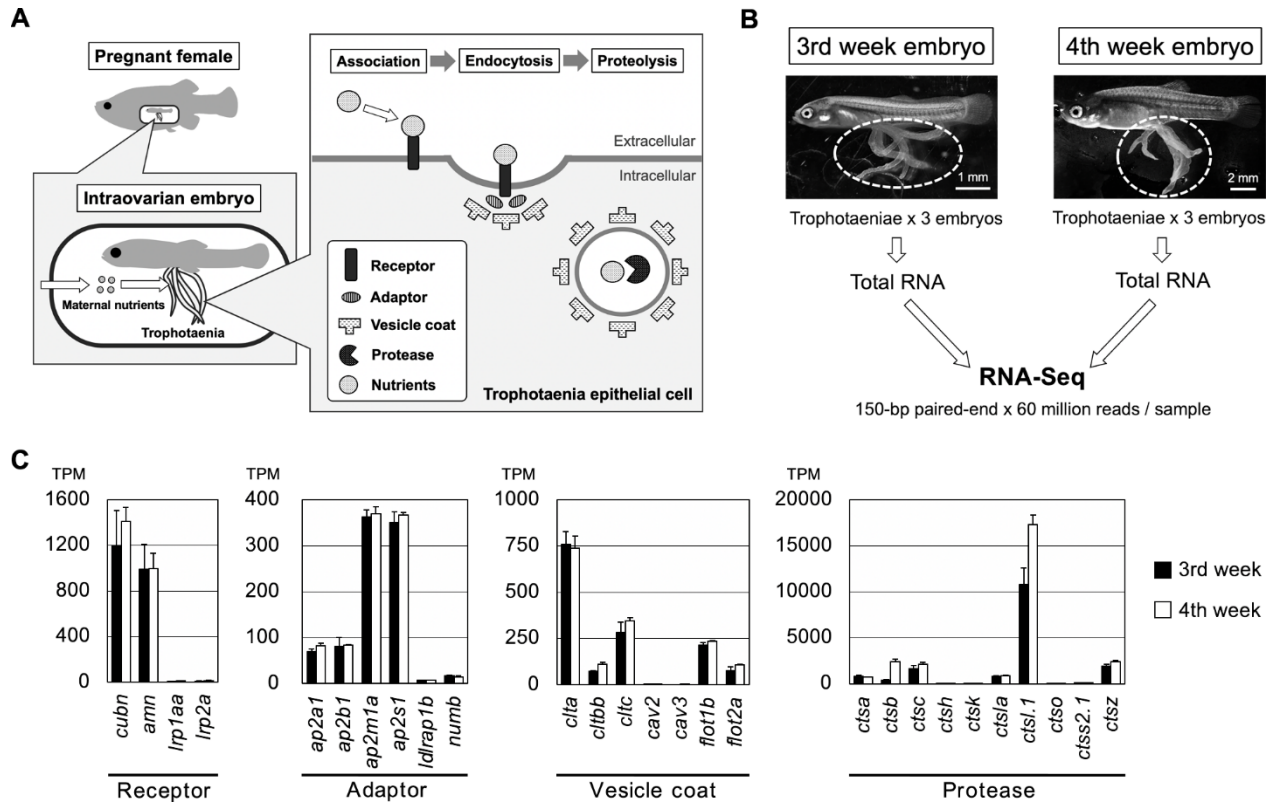

434

435 **Figure 1. Exploring candidate genes for nutrient absorption**

436 **A.** A working model and hypothesis of this study. In the goodeid viviparous fish (*X. eiseni*), intraovarian

437 embryo absorbs maternal nutrients via the trophotaenia. We hypothesized that endocytosis-mediated

438 proteolysis is related to nutrient absorption. Based on the scenario, potential target genes are for

439 endocytic receptors, adaptors, vesicle coating proteins, and proteases. **B.** An experimental scheme for the

440 RNA-Seq analysis. RNA samples were obtained from the trophotaeniae (white dotted line) of the single

441 intraovarian embryos extracted from the pregnant females of the 3<sup>rd</sup>- or 4<sup>th</sup>-week post-mating. The RNA-

442 Seq was performed using three samples at every stage. **C.** The graphs indicate the TPM values of the

443 genes selected from the RNA-Seq data that are involved in the endocytosis-mediated proteolysis pathway.

444



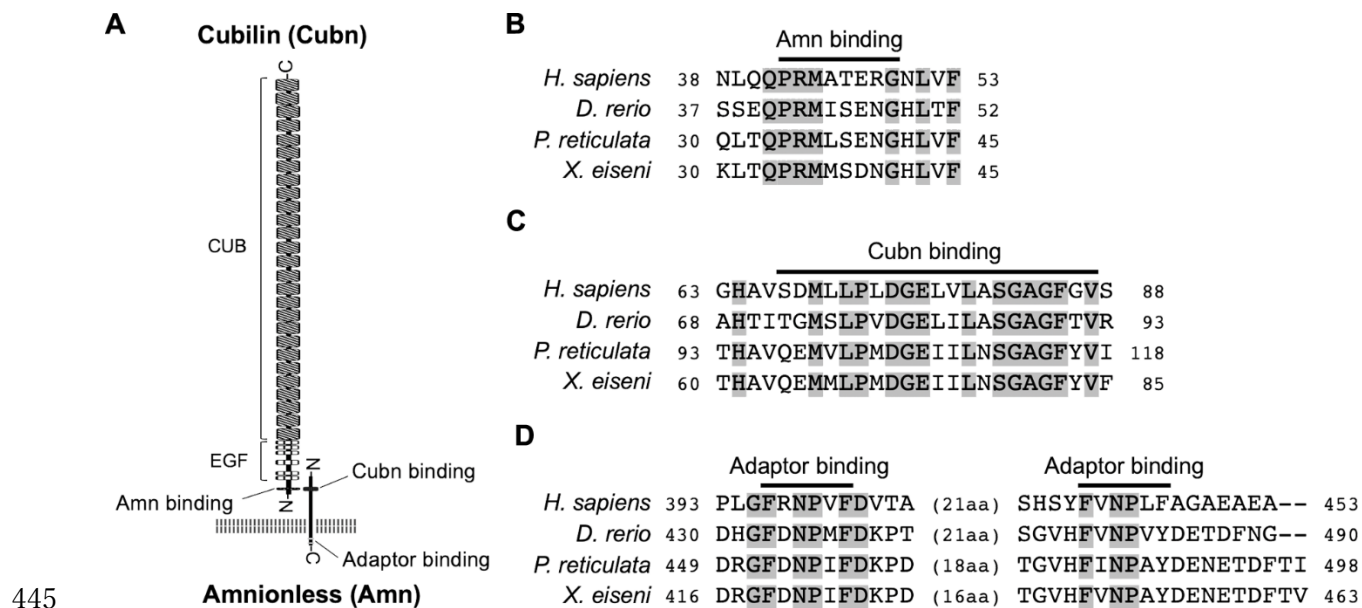

446 **Figure 2. Structures and amino acid sequences for *X. eiseni* Cubn and Amn**

447 **A.** The illustration indicates that a typical structure of Cubam receptor complex consists of Cubn and Amn.

448 Both proteins possess a conserved motif to bind each other in the N-terminal regions, and the Amn

449 possesses two adaptor binding motifs in the C-terminal intracellular domain. **B-D.** A comparison of amino

450 acid sequence around the Amn-binding motif in Cubn (**B**), Cubn-binding motif in Amn (**C**), and adaptor

451 binding motifs in Amn (**D**) between *X. eiseni* and three other vertebrate species. The gray filled texts are

452 conserved sequences among the four species.

453

454

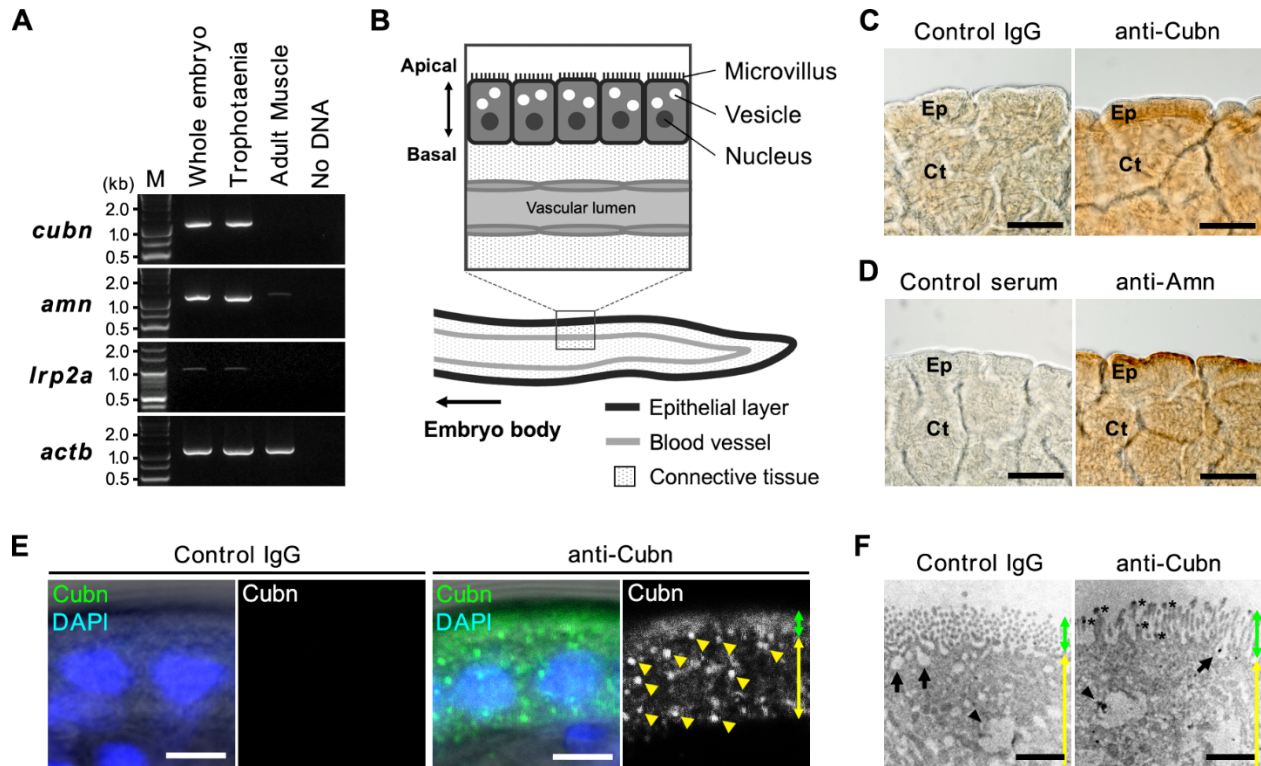

455

456 **Figure 3. Distribution of receptors involved in endocytosis**

457 **A.** RT-PCR for the candidate genes for the receptors involved in the endocytosis. All amplicons were  
 458 detected as single band on the expected sizes based on the transcript sequences obtained from the *de*  
 459 *novo* assembly. **B.** The illustration indicates an internal structure of the trophotaenia. An epithelium cell  
 460 layer configures an outermost structure of the trophotaenia, which contacts the ovarian luminal fluids. The  
 461 layer consists of an enterocyte-like cell with microvilli on the apical surface and vesicles in the cytoplasm.  
 462 **C-D.** Immunohistochemistry using the Cubn antibody or Amn antiserum in the trophotaenia. In both  
 463 samples, DAB color development was observed in the epithelial layer. Ep, epithelial layer. Ct, connective  
 464 tissue. Scale bar, 50  $\mu$ m. **E.** Confocal microscopy images of fluorescent immunohistochemistry using the  
 465 Cubn antibody in the epithelial layer cells. Yellow triangles indicate the dotted signals in the epithelial cells  
 466 of the trophotaenia. Green double-headed arrow indicates the apical surface defined by the flat signal.

467 Yellow double-headed arrow indicates the cytoplasmic region including the dotted signals. Scale bar, 5  
468  $\mu\text{m}$ . **F.** Immunoelectron microscopy using the Cubn antibody in the epithelial layer cells. Green double-  
469 headed arrow indicates the microvilli on the apical surface. Yellow double-headed arrow indicates the  
470 cytoplasmic region including the dotted signals. Asterisks indicate anti-Cubn signals in the microvilli.  
471 Arrows indicate endocytic vesicles in the invagination phase. Arrowheads indicate intracellular vesicles  
472 after endocytosis. Anti-Cubilin signals were observed in both vesicles. Scale bar, 1  $\mu\text{m}$ .  
473

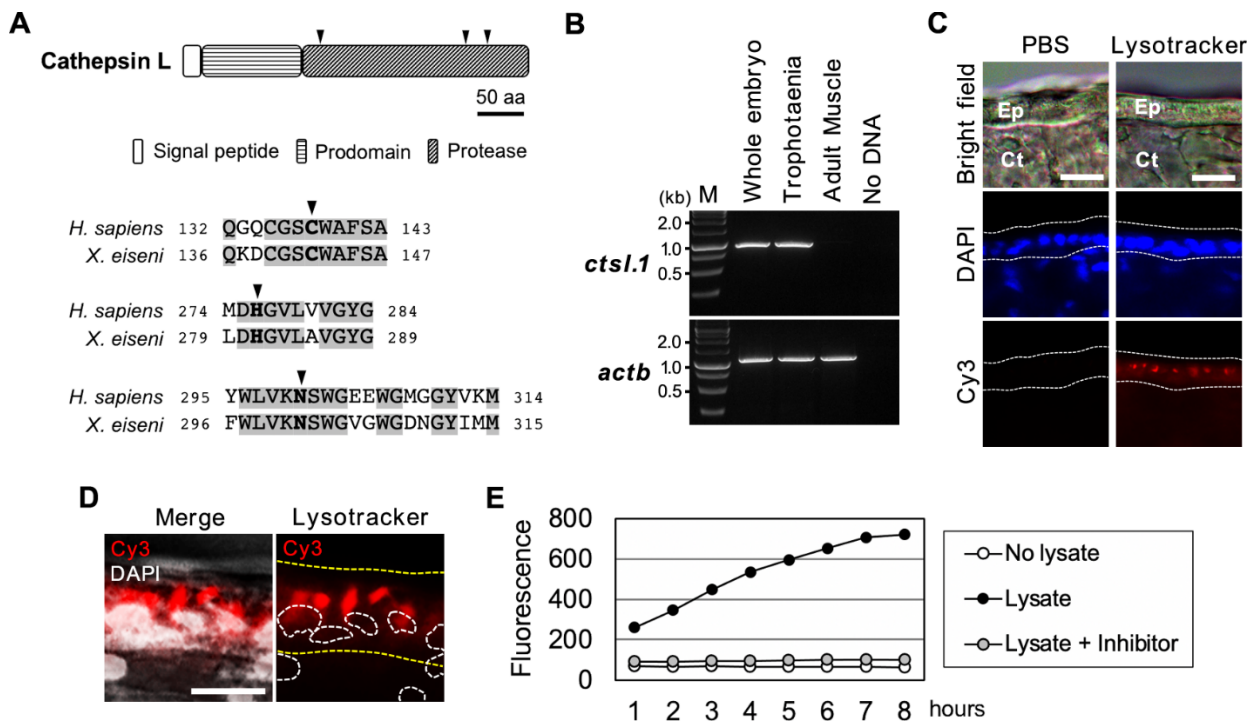

474

475 **Figure 4. Proteolysis activities in trophotaenia**

476 **A.** The illustrations indicate a typical structure of cathepsin L and a comparison of the protease domains of  
 477 cathepsin L between *H. sapiens* and *X. eiseni*. The gray filled texts are conserved sequences among the  
 478 species. The black triangles indicate protease active sites. **B.** RT-PCR for *ctsl.1* exhibited the highest TPM  
 479 value in the RNA-Seq analysis. The amplicons were detected as a single band on the expected size  
 480 based on the transcript sequences obtained from the *de novo* assembly. **C.** Labeling of acidic organelles  
 481 including lysosomal vesicle in the trophotaenia. The lysotracker treatment exhibited red fluorescence in  
 482 the epithelial layer (white dotted line). Ep, epithelial layer. Ct, connective tissue. Scale bar, 20  $\mu$ m. **D.** High  
 483 magnification image of the lysotracker-treated epithelial cell layer of the trophotaenia. Yellow dotted line  
 484 indicates the epithelial layer and white dotted circles are the nuclei of the epithelial cells. The lysotracker  
 485 fluorescence was observed in the cytoplasm. Scale bar, 10  $\mu$ m. **E.** Measurement of cathepsin L activity  
 486 based on fluorescent substrate degradation. The vertical line indicates the accumulation of cleaved  
 487 fluorescent substrates, which means cathepsin L activity in the sample solution. The fluorescent value of

488 the trophotaenia lysate sample was increased by 8 h after the reaction started.

489

**Viviparous mammal**  
(*Mus musculus*)

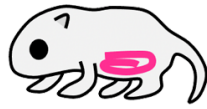

**Stomachless fish**  
(*Danio rerio*)

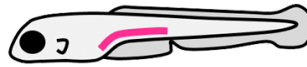

**Viviparous fish**  
(*Xenotoca eiseni*)

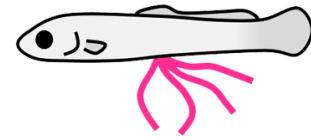

|               |                   |                         |                            |
|---------------|-------------------|-------------------------|----------------------------|
| <b>Stage</b>  | Suckling          | Larva ~ Adult           | Intraovarian embryo        |
| <b>Tissue</b> | Intestine (Ileum) | Intestine (LREs)        | <b>Trophotaenia</b>        |
| <b>Factor</b> | <i>Dab2</i>       | <i>cubn, dab2</i>       | <i>cubn, amn, ctsl.1</i>   |
| <b>Target</b> | Oral food (Milk)  | Oral food (Normal diet) | <b>Maternal supplement</b> |

490

491 **Figure 5. Comparison of endocytosis-mediated nutrient intake in vertebrates**

492 Endocytosis-mediated nutrient intake has also been reported in a viviparous mammal and stomachless  
 493 fish. In these species, oral ingestion macromolecules are absorbed from a region of the intestine via  
 494 endocytosis. In contrast, intraovarian embryos of the viviparous fish (family Goodeidae) absorbs the  
 495 maternal component in the ovarian fluids from the trophotaeniae via endocytosis. Endocytosis in each  
 496 species is predicted to be driven by similar molecular process in the enterocytes of the intestine or the  
 497 enterocyte-like cells of trophotaenia; however, the biological ontology would be divergent between the  
 498 viviparous fish (intraovarian growth) and the others (feeding after birth).

499

500
